# Supplementary material
Source: PubMed Central journal article supplement (PMC6299349)
Supplement: 29447_Appendix.pdf [file 29447_Appendix.pdf]

**Table A1.** Survey Questions

| Question                                                                                                                                                                                                                                                                                                                        |
|---------------------------------------------------------------------------------------------------------------------------------------------------------------------------------------------------------------------------------------------------------------------------------------------------------------------------------|
| 1. Age                                                                                                                                                                                                                                                                                                                          |
| 2. Date of birth                                                                                                                                                                                                                                                                                                                |
| 3. Nationality                                                                                                                                                                                                                                                                                                                  |
| 4. How many siblings do you have?                                                                                                                                                                                                                                                                                               |
| 5. How many of your siblings play professional sports? Please specify sport and what level.                                                                                                                                                                                                                                     |
| 6. Did either of your parents play professional level sport. Please specify which parent, sport, and what level.                                                                                                                                                                                                                |
| 7. How many children do you have?                                                                                                                                                                                                                                                                                               |
| 8. At what age did you begin to play organized sports?                                                                                                                                                                                                                                                                          |
| 9. Please list sports you participated in as a child or adolescent and specify at what ages you participated.                                                                                                                                                                                                                   |
| 10. At what age did you decide to stop playing other sports competitively and only focus on ice hockey?                                                                                                                                                                                                                         |
| 11. How many years have you played in the following professional leagues: National Hockey League, Kontinental Hockey League, American Hockey League, East Coast Hockey League, other (please specify)?                                                                                                                          |
| 12. Please rank the major motivation(s) behind your choice to focus exclusively on ice hockey (1 = highest motivation, 5 = lowest motivation): self, peer/friend, parent, coach, other (please specify).                                                                                                                        |
| 13. During your career, have you had any injury or problem with any of the following areas of your body? Please state problem/injury, games/practice missed, and age(s) at which it occurred. If you do not know, please estimate. Concussion, neck, shoulder, elbow, wrist, hand, back, hip, knee, leg, ankle, foot, or other. |
